# Supplementary material for: Glioblastoma Molecular Classification Tool Based on mRNA Analysis: From Wet-Lab to Subtype
Source: MDPI journal article supplement (doi:10.3390/ijms232415875), 2022-12-14
Supplement: s1 [file s1]

**Table S1.** Overlapping signature genes per different datasets and their expression correlation between platforms

| No. | <i>Signatures proposed elsewhere</i>                                                                                                                                   | <i>Genes level measurements available at:</i>                                                                              | Correlation between platforms (Spearman's r) | FDR      | Selected |
|-----|------------------------------------------------------------------------------------------------------------------------------------------------------------------------|----------------------------------------------------------------------------------------------------------------------------|----------------------------------------------|----------|----------|
|     | <ul style="list-style-type: none"> <li>• Verhaak et al, 2010;</li> <li>• Phillips et al, 2006;</li> <li>• Wang et al, 2017;</li> <li>• Sandmann et al, 2015</li> </ul> | <ul style="list-style-type: none"> <li>• Agilent G4502</li> <li>• Affymetrix HG-U133a</li> <li>• Illumina HiSeq</li> </ul> |                                              |          |          |
| 1   | ABL1                                                                                                                                                                   | ABL1                                                                                                                       | 0,502                                        | 4,15E-32 | No       |
| 2   | ANGPTL4                                                                                                                                                                | ANGPTL4                                                                                                                    | 0,898                                        | 5,2E-176 | Yes      |
| 3   | ATP6V1G2                                                                                                                                                               | ATP6V1G2                                                                                                                   | 0,714                                        | 3,23E-77 | Yes      |
| 4   | BCAS1                                                                                                                                                                  | BCAS1                                                                                                                      | 0,879                                        | 3,4E-159 | Yes      |
| 5   | BOP1                                                                                                                                                                   | BOP1                                                                                                                       | 0,604                                        | 1,38E-49 | No       |
| 6   | CASP1                                                                                                                                                                  | CASP1                                                                                                                      | 0,82                                         | 2,2E-120 | Yes      |
| 7   | CASP4                                                                                                                                                                  | CASP4                                                                                                                      | 0,696                                        | 5,87E-72 | Yes      |
| 8   | CASP5                                                                                                                                                                  | CASP5                                                                                                                      | 0,499                                        | 9,56E-32 | No       |
| 9   | CASP8                                                                                                                                                                  | CASP8                                                                                                                      | 0,442                                        | 2,12E-24 | No       |
| 10  | CCR5                                                                                                                                                                   | CCR5                                                                                                                       | 0,627                                        | 1,91E-54 | No       |
| 11  | CD4                                                                                                                                                                    | CD4                                                                                                                        | 0,637                                        | 1,01E-56 | No       |
| 12  | CDH4                                                                                                                                                                   | CDH4                                                                                                                       | 0,821                                        | 5,4E-121 | Yes      |
| 13  | CDK6                                                                                                                                                                   | CDK6                                                                                                                       | 0,61                                         | 9,25E-51 | No       |
| 14  | CENPK                                                                                                                                                                  |                                                                                                                            |                                              |          |          |
| 15  | CHI3L1                                                                                                                                                                 | CHI3L1                                                                                                                     | 0,713                                        | 5,02E-77 | Yes      |
| 16  | COL4A1                                                                                                                                                                 | COL4A1                                                                                                                     | 0,817                                        | 8E-119   | Yes      |
| 17  | COL4A2                                                                                                                                                                 | COL4A2                                                                                                                     | 0,801                                        | 5,9E-111 | Yes      |
| 18  | CSDC2                                                                                                                                                                  | CSDC2                                                                                                                      | 0,639                                        | 3,9E-57  | No       |
| 19  | CSPG5                                                                                                                                                                  | CSPG5                                                                                                                      | 0,691                                        | 2,64E-70 | Yes      |
| 20  | DAB2                                                                                                                                                                   | DAB2                                                                                                                       | 0,798                                        | 1,8E-109 | Yes      |
| 21  | DLL3                                                                                                                                                                   | DLL3                                                                                                                       | 0,861                                        | 1,5E-145 | Yes      |
| 22  | DNM3                                                                                                                                                                   | DNM3                                                                                                                       | 0,74                                         | 9,09E-86 | Yes      |
| 23  | DNMT1                                                                                                                                                                  | DNMT1                                                                                                                      | 0,747                                        | 1,75E-88 | Yes      |
| 24  | DTL                                                                                                                                                                    | DTL                                                                                                                        | 0,807                                        | 1,2E-113 | Yes      |
| 25  | E2F7                                                                                                                                                                   |                                                                                                                            |                                              |          |          |
| 26  | EGFR                                                                                                                                                                   | EGFR                                                                                                                       | 0,865                                        | 2,9E-148 | Yes      |
| 27  | PLA2G5                                                                                                                                                                 | PLA2G5                                                                                                                     | 0,75                                         | 2,52E-89 | Yes      |
| 28  | ERBB3                                                                                                                                                                  | ERBB3                                                                                                                      | 0,699                                        | 8,92E-73 | Yes      |
| 29  | FAM21C                                                                                                                                                                 |                                                                                                                            |                                              |          |          |
| 30  | FBXO3                                                                                                                                                                  | FBXO3                                                                                                                      | 0,567                                        | 2,04E-42 | No       |
| 31  | FCGR2B                                                                                                                                                                 | FCGR2B                                                                                                                     | 0,849                                        | 2,9E-137 | Yes      |
| 32  | FERMT1                                                                                                                                                                 | FERMT1                                                                                                                     | 0,86                                         | 2,6E-145 | Yes      |
| 33  | FGFR3                                                                                                                                                                  | FGFR3                                                                                                                      | 0,85                                         | 6,5E-138 | Yes      |
| 34  | FOSL2                                                                                                                                                                  | FOSL2                                                                                                                      | 0,791                                        | 3,9E-106 | Yes      |
| 35  | GABBR1                                                                                                                                                                 | GABBR1                                                                                                                     | 0,693                                        | 7,87E-71 | Yes      |
| 36  | GABRB2                                                                                                                                                                 | GABRB2                                                                                                                     | 0,135                                        | 0,003774 | No       |
| 37  | GALNT13                                                                                                                                                                |                                                                                                                            |                                              |          |          |
| 38  | GPR17                                                                                                                                                                  | GPR17                                                                                                                      | 0,816                                        | 1,4E-118 | Yes      |
| 39  | HMMR                                                                                                                                                                   | HMMR                                                                                                                       | 0,64                                         | 2,34E-57 | No       |
| 40  | IL4R                                                                                                                                                                   | IL4R                                                                                                                       | 0,779                                        | 6,1E-101 | Yes      |
| 41  | IQGAP3                                                                                                                                                                 |                                                                                                                            |                                              |          |          |

**Table S1.** Overlapping signature genes per different datasets and their expression correlation between platforms

|    |                  |                  |       |          |                  |
|----|------------------|------------------|-------|----------|------------------|
| 42 | KLRC3            | KLRC3            | 0,824 | 1,1E-122 | Yes              |
| 43 | LIF              | LIF              | 0,798 | 1,7E-109 | Yes              |
| 44 | MBP              | MBP              | 0,842 | 6,9E-133 | Yes              |
| 45 | MET              | MET              | 0,708 | 1,76E-75 | Yes              |
| 46 | MYL9             | MYL9             | 0,768 | 2,17E-96 | Yes              |
| 47 | NCAM1            | NCAM1            | 0,537 | 2,06E-37 | No               |
| 48 | NDRG2            | NDRG2            | 0,799 | 7,9E-110 | Yes              |
| 49 | NES              | NES              | 0,691 | 2,39E-70 | Yes              |
| 50 | NKX2.2           | NKX2.2           | 0,729 | 6,52E-82 | Yes              |
| 51 | NR2E1            | NR2E1            | 0,774 | 6,9E-99  | Yes              |
| 52 | OLIG2            | OLIG2            | 0,72  | 4,54E-79 | Yes              |
| 53 | OPHN1            |                  |       |          |                  |
| 54 | PDGFA            | PDGFA            | 0,808 | 3,2E-114 | Yes              |
| 55 | PDGFRA           | PDGFRA           | 0,885 | 2,3E-164 | Yes              |
| 56 | PDLIM4           | PDLIM4           | 0,896 | 7,4E-175 | Yes              |
| 57 | PDPN             | PDPN             | 0,814 | 3,1E-117 | Yes              |
| 58 | PFN2             | PFN2             | 0,819 | 1,1E-119 | Yes              |
| 59 | PTPRC            | PTPRC            | 0,775 | 3,5E-99  | Yes              |
| 60 | RASL10A          | RASL10A          | 0,823 | 4,1E-122 | Yes              |
| 61 | RELB             | RELB             | 0,656 | 4,99E-61 | Yes              |
| 62 | SCG3             | SCG3             | 0,779 | 4,8E-101 | Yes              |
| 63 | SERPINE1         | SERPINE1         | 0,853 | 3,1E-140 | Yes              |
| 64 | SNAP91           | SNAP91           | 0,771 | 1,35E-97 | Yes              |
| 65 | SNCG             | SNCG             | 0,45  | 2,57E-25 | No               |
| 66 | SOX2             | SOX2             | 0,679 | 5,59E-67 | Yes              |
| 67 | SOX8             |                  |       |          |                  |
| 68 | SPOCD1           |                  |       |          |                  |
| 69 | SPRY2            | SPRY2            | 0,816 | 4,1E-118 | Yes              |
| 70 | SRRM2            | SRRM2            | 0,689 | 7,42E-70 | Yes              |
| 71 | TAGLN            | TAGLN            | 0,831 | 2,2E-126 | Yes              |
| 72 | TIMP1            | TIMP1            | 0,874 | 1,9E-155 | Yes              |
| 73 | TLR2             | TLR2             | 0,777 | 5,9E-100 | Yes              |
| 74 | TLR4             | TLR4             | 0,625 | 5,49E-54 | No               |
| 75 | TOP1             | TOP1             | 0,525 | 1,57E-35 | No               |
| 76 | TRADD            | TRADD            | 0,721 | 1,83E-79 | Yes              |
| 77 | VAV3             | VAV3             | 0,872 | 2,7E-154 | Yes              |
|    | <b>Total: 77</b> | <b>Total: 69</b> |       |          | <b>Total: 54</b> |
